# Supplementary material
Source: PubMed Central journal article supplement (PMC3187066)
Supplement: supp_10_10_1367__1.pdf [file supp_10_10_1367__1.pdf]

*Supplementary materials to*

**Mitochondrial Genomic Dysfunction Causes Dephosphorylation of Sch9 in the Yeast *Saccharomyces cerevisiae***

Shigeyuki Kawai, Jörg Urban, Manuele Piccolis, Nicolas Panchaud, Claudio De Virgilio, and Robbie Loewith

Supplementary Table S1.

Supplementary Fig. S1.

Supplementary Table S1. Yeast strains used in this study.

| Strains              | Genotypes                                                                                                                            | Sources    |
|----------------------|--------------------------------------------------------------------------------------------------------------------------------------|------------|
| TB50 $\alpha$        | MAT $\alpha$ <i>trp1 his3 ura3 leu2 rme1</i> [ $\rho^+$ ]                                                                            | Lab. stock |
| RL170-2b             | TB50 $\alpha$ <i>TCO89-TAP[KITrp1]</i> [ $\rho^+$ ]                                                                                  | Lab. stock |
| YGSK226              | TB50 $\alpha$ <i>TCO89-TAP[KITrp1]</i> pJU676 pJU450 [ $\rho^+$ ]                                                                    | This study |
| YGSK232              | TB50 $\alpha$ <i>TCO89-TAP[KITrp1]</i> [ $\rho^0$ ]                                                                                  | This study |
| YGSK242              | TB50 $\alpha$ <i>TCO89-TAP[KITrp1]</i> pJU676 pJU450 [ $\rho^0$ ]                                                                    | This study |
| YGSK269              | TB50 $\alpha$ <i>TCO89-TAP[KITrp1]</i> pJU675 pJU450 [ $\rho^+$ ]                                                                    | This study |
| YGSK270              | TB50 $\alpha$ <i>TCO89-TAP[KITrp1]</i> pJU841 pJU450 [ $\rho^+$ ]                                                                    | This study |
| YGSK271              | TB50 $\alpha$ <i>TCO89-TAP[KITrp1]</i> pJU675 pJU450 [ $\rho^0$ ]                                                                    | This study |
| YGSK272              | TB50 $\alpha$ <i>TCO89-TAP[KITrp1]</i> pJU841 pJU450 [ $\rho^0$ ]                                                                    | This study |
| TB50a                | MATa <i>trp1 his3 ura3 leu2 rme1</i> [ $\rho^+$ ]                                                                                    | Lab. stock |
| RL276-5D             | TB50a <i>HIS3 LEU2</i> [ $\rho^+$ ]                                                                                                  | Lab. stock |
| YGSK239 <sup>a</sup> | TB50a <i>HIS3 LEU2</i> [ $\rho^0$ ]                                                                                                  | This study |
| YGSK197 <sup>a</sup> | TB50a <i>TCO89-TAP[KITrp1] kog1<math>\Delta</math>::kanMX6 snf1<math>\Delta</math>::hph</i><br>YCplac111:: <i>KOG1</i> [ $\rho^+$ ]  | This study |
| BY4742               | MAT $\alpha$ <i>leu2<math>\Delta</math>0 lys2<math>\Delta</math>0 ura3<math>\Delta</math>0 his3<math>\Delta</math>1</i> [ $\rho^+$ ] | Euroscarf  |
| YGSK229              | BY4742 pJU676 pJU450 [ $\rho^+$ ]                                                                                                    | This study |
| YGSK233 <sup>a</sup> | BY4742 [ $\rho^0$ ]                                                                                                                  | This study |
| YGSK243              | BY4742 pJU676 pJU450 [ $\rho^0$ ]                                                                                                    | This study |
| BY4741               | MATa <i>leu2<math>\Delta</math>0 met15<math>\Delta</math>0 ura3<math>\Delta</math>0 his3<math>\Delta</math>1</i> [ $\rho^+$ ]        | Euroscarf  |
| YGSK238 <sup>a</sup> | BY4741 [ $\rho^0$ ]                                                                                                                  | This study |

|                      |                                                                                   |            |
|----------------------|-----------------------------------------------------------------------------------|------------|
| YGSK221              | BY4741 <i>atp2Δ::kanMX4</i> [ $\rho^+$ ]                                          | Euroscarf  |
| YGSK247              | BY4741 <i>atp2Δ::kanMX4</i> pJU676 pJU450 [ $\rho^+$ ]                            | This study |
| YGSK219              | BY4741 <i>cox6Δ::kanMX4</i> [ $\rho^+$ ]                                          | Euroscarf  |
| YGSK248 <sup>a</sup> | BY4741 <i>cox6Δ::kanMX4</i> pJU676 pJU450 [ $\rho^+$ ]                            | This study |
| YGSK222              | BY4741 <i>mrpl16Δ::kanMX4</i> [ $\rho^+$ ]                                        | Euroscarf  |
| YGSK249              | BY4741 <i>mrpl16Δ::kanMX4</i> pJU676 pJU450 [ $\rho^+$ ]                          | This study |
| MK3306               | BY4742 pRS315 pJU676 pRS413 [ $\rho^+$ ]                                          | This study |
| MK3307               | BY4742 pRS315 pJU676 pRS413 [ $\rho^0$ ]                                          | This study |
| MK3309 <sup>b</sup>  | BY4742 pPL132 (pRS315:: <i>TOR1</i> ) pRS413 pJU450 [ $\rho^0$ ]                  | This study |
| MK3311 <sup>b</sup>  | BY4742 pPL156 (pRS315:: <i>TOR1</i> I1954V) pRS413 pJU450 [ $\rho^0$ ]            | This study |
| MK3313 <sup>b</sup>  | BY4742 pPL158 (pRS315:: <i>TOR1</i> I1954V W2176R) pRS413 pJU450 [ $\rho^0$ ]     | This study |
| MK3354 <sup>c</sup>  | BY4742 <i>gtr1Δ::kanMX4</i> YCplac33::pTetON-GTR1-Q65L pJU679 pRS413 [ $\rho^+$ ] | This study |
| MK3355               | BY4742 <i>gtr1Δ::kanMX4</i> YCplac33 pJU679 pRS413 [ $\rho^+$ ]                   | This study |
| MK3356 <sup>c</sup>  | BY4742 <i>gtr1Δ::kanMX4</i> YCplac33::pTetON-GTR1-Q65L pJU679 pRS413 [ $\rho^0$ ] | This study |
| MK3357               | BY4742 <i>gtr1Δ::kanMX4</i> YCplac33 pJU679 pRS413 [ $\rho^0$ ]                   | This study |

---

<sup>a</sup> These strains were used for checking  $\rho^+$  or  $\rho^0$  phenotype.

<sup>b</sup> Plasmids (pPL132, 156, and 158) were kindly gifted from Dr. Ted Powers (3).

<sup>c</sup> Plasmid (YCplac33::pTetON-GTR1-Q65L) is described in ref (2).

**A**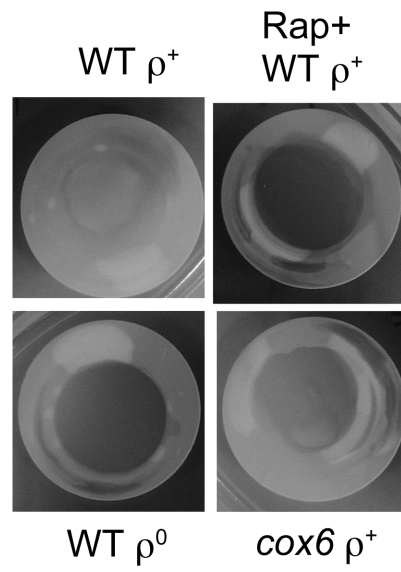**B**

phospho-Sch9 C-ter. {  
Sch9 C-ter. -

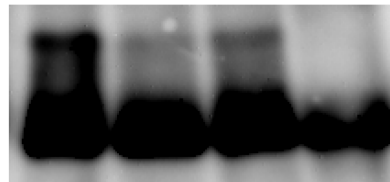

|             |   |          |   |
|-------------|---|----------|---|
| GTR1        | - | GTR1     | - |
| Q65L        | - | Q65L     | - |
| $\rho^+$    |   | $\rho^0$ |   |
| <i>gtr1</i> |   |          |   |

**Fig. S1**

Figure legend of Supplementary Fig. S1

FIG. S1 (A) Accumulation of glycogen. YGSK229 (WT  $\rho^+$ ), YGSK243 (WT  $\rho^0$ ), and YGSK248 (*cox6*  $\rho^+$ ) (*cox6*  $\rho^+$ ) cells were diluted to an  $A_{600}$  of 0.4 in fresh SD+Asn medium (containing: 2 % glucose, 10 mM Asn, 0.17 % yeast nitrogen base without ammonium sulfate [pH 5.6] plus 50  $\mu\text{g/ml}$  Lys for YGSK229 and YGSK243, 20  $\mu\text{g/ml}$  Met for YGSK248) and cultivated for approximately 4.5 h. YGSK229 cells were also cultivated in another flask as above for 3 h, and further cultivated for 1.5 h in the presence of 200 ng/ml rapamycin. 7.5  $A_{600}$  equivalents of cells were filtered and treated with iodine vapour to stain glycogen as described (1). Dark staining indicates that glycogen was accumulated in; YGSK243 (WT  $\rho^0$ ) and rapamycin-treated YGSK229 (Rap+ WT  $\rho^+$ ) cells, but not in YGSK229 (WT  $\rho^+$ ) and YGSK248 (*cox6*  $\rho^+$ ) cells. (B) Sch9 is dephosphorylated independently of GTR1 in  $\rho^0$  cells. MK3354 (*gtr1* YCplac33::pTetON-GTR1-Q65L  $\rho^+$ ), MK3355 (*gtr1* YCplac33  $\rho^+$ ), MK3356 (*gtr1* YCplac33::pTetON-GTR1-Q65L  $\rho^0$ ), and MK3357 (*gtr1* YCplac33  $\rho^0$ ) cells were cultured in SD+Asn medium containing 50  $\mu\text{g/ml}$  Lys and 5  $\mu\text{g/ml}$  doxycycline, diluted to an  $OD_{600}$  of 0.4 in the same medium, and further cultivated for 5.5 h. Sch9-phosphorylations were monitored as described in the text. Prior to SDS-PAGE / anti-HA blot, protein extracts were treated with NTCB to cleave proteins.

## REFERENCES

1. **Barbet, N. C., U. Schneider, S. B. Helliwell, I. Stansfield, M. F. Tuite, and M. N. Hall.** 1996. TOR controls translation initiation and early G1 progression in yeast. *Mol. Biol. Cell* **7**:25-42.
2. **Binda, M., M. P. Peli-Gulli, G. Bonfils, N. Panchaud, J. Urban, T. W. Sturgill, R. Loewith, and C. De Virgilio.** 2009. The Vam6 GEF controls TORC1 by activating the EGO complex. *Mol. Cell* **35**:563-573.
3. **Reinke, A., J. C. Chen, S. Aronova, and T. Powers.** 2006. Caffeine targets TOR complex I and provides evidence for a regulatory link between the FRB and kinase domains of Tor1p. *J. Biol. Chem.* **281**:31616-31626.
